# Supplementary material
Source: Elsevier journal article supplement (https://www.sciencedirect.com/science/article/pii/S0211563820300298)
Supplement: mmc1 [file S0211563820300298:mmc1.pdf]

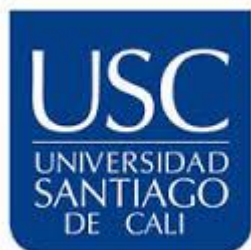

## CUESTIONARIO

**Instrumento para medir el alcance en las acciones del fisioterapeuta en la rehabilitación de personas con discapacidad (IFRIPD).**

**Si usted es fisioterapeuta e interviene personas con discapacidad, responda el siguiente cuestionario:**

|                                                             |                                                       |                                                      |                                                       |                                               |
|-------------------------------------------------------------|-------------------------------------------------------|------------------------------------------------------|-------------------------------------------------------|-----------------------------------------------|
| Género                                                      | 1. Masculino<br><input type="checkbox"/>              |                                                      | 2. Femenino<br><input type="checkbox"/>               |                                               |
| Edad                                                        | 1. Años cumplidos<br><input type="text"/>             |                                                      |                                                       |                                               |
| ¿Cuál es el nivel educativo más alto alcanzado?             | 1. Pregrado<br><input type="checkbox"/>               | 2. Especialización<br><input type="checkbox"/>       | 3. Maestría<br><input type="checkbox"/>               | 4. Doctorado<br><input type="checkbox"/>      |
| ¿En cuál de las siguientes áreas usted ejerce la profesión? | 1. Osteomuscular<br><input type="checkbox"/>          | 2. Neurológico<br><input type="checkbox"/>           | 3. Respiratorio<br><input type="checkbox"/>           | 4. Cardiopulmonar<br><input type="checkbox"/> |
| ¿Qué tipo de personas suele intervenir usted?               | 1. Pediátrico (< 18 años)<br><input type="checkbox"/> | 2. Adulto (19 a 64 años)<br><input type="checkbox"/> | 3. Geriátrico (> 65 años)<br><input type="checkbox"/> |                                               |

| Acciones del fisioterapeuta en el Microsistema |                                                                                                        |                          |                          |                          |                          |
|------------------------------------------------|--------------------------------------------------------------------------------------------------------|--------------------------|--------------------------|--------------------------|--------------------------|
|                                                |                                                                                                        | Casi nunca               | Nunca                    | Casi siempre             | Siempre                  |
| 1.                                             | ¿Usted evalúa y valora a la persona con discapacidad integralmente?                                    | <input type="checkbox"/> | <input type="checkbox"/> | <input type="checkbox"/> | <input type="checkbox"/> |
| 2.                                             | ¿Usted evalúa las funciones corporales de la persona con discapacidad?                                 | <input type="checkbox"/> | <input type="checkbox"/> | <input type="checkbox"/> | <input type="checkbox"/> |
| 3.                                             | ¿Usted evalúa las estructuras corporales de la persona con discapacidad?                               | <input type="checkbox"/> | <input type="checkbox"/> | <input type="checkbox"/> | <input type="checkbox"/> |
| 4.                                             | ¿Usted evalúa las limitaciones en la actividad de la persona con discapacidad?                         | <input type="checkbox"/> | <input type="checkbox"/> | <input type="checkbox"/> | <input type="checkbox"/> |
| 5.                                             | ¿Usted evalúa las restricciones en la participación de la persona con discapacidad en entornos reales? | <input type="checkbox"/> | <input type="checkbox"/> | <input type="checkbox"/> | <input type="checkbox"/> |
| 6.                                             | ¿Usted evalúa los factores personales del individuo con discapacidad?                                  | <input type="checkbox"/> | <input type="checkbox"/> | <input type="checkbox"/> | <input type="checkbox"/> |
| 7.                                             | ¿Usted realiza rehabilitación funcional a la persona con discapacidad?                                 | <input type="checkbox"/> | <input type="checkbox"/> | <input type="checkbox"/> | <input type="checkbox"/> |

|                                                      |                                                                                                                                                                                  |                          |                          |                          |                          |
|------------------------------------------------------|----------------------------------------------------------------------------------------------------------------------------------------------------------------------------------|--------------------------|--------------------------|--------------------------|--------------------------|
| 8.                                                   | ¿Usted indaga sobre la atención en salud que recibe la persona con discapacidad diferente a fisioterapia?                                                                        | <input type="checkbox"/> | <input type="checkbox"/> | <input type="checkbox"/> | <input type="checkbox"/> |
| 9.                                                   | ¿Usted indaga sobre el acceso a programas de acondicionamiento físico, nutrición, terapia domiciliar y demás servicios de salud, si así lo requiere la persona con discapacidad? | <input type="checkbox"/> | <input type="checkbox"/> | <input type="checkbox"/> | <input type="checkbox"/> |
| 10.                                                  | ¿Usted trabaja con otros profesionales de la salud en la institución donde labora?                                                                                               | <input type="checkbox"/> | <input type="checkbox"/> | <input type="checkbox"/> | <input type="checkbox"/> |
| 11.                                                  | ¿Usted interviene a la persona con discapacidad desde la multidisciplinariedad?                                                                                                  | <input type="checkbox"/> | <input type="checkbox"/> | <input type="checkbox"/> | <input type="checkbox"/> |
| 12.                                                  | ¿Usted interviene a la persona con discapacidad desde la interdisciplinariedad?                                                                                                  | <input type="checkbox"/> | <input type="checkbox"/> | <input type="checkbox"/> | <input type="checkbox"/> |
| 13.                                                  | ¿Usted trabaja con profesionales de áreas del conocimiento diferente a la salud en la institución donde labora?                                                                  | <input type="checkbox"/> | <input type="checkbox"/> | <input type="checkbox"/> | <input type="checkbox"/> |
| 14.                                                  | ¿Usted interviene a la persona con discapacidad desde la transdisciplinariedad?                                                                                                  | <input type="checkbox"/> | <input type="checkbox"/> | <input type="checkbox"/> | <input type="checkbox"/> |
| 15.                                                  | ¿Usted promueve cambios en el entorno de acuerdo a la discapacidad de la persona que interviene?                                                                                 | <input type="checkbox"/> | <input type="checkbox"/> | <input type="checkbox"/> | <input type="checkbox"/> |
| 16.                                                  | ¿Usted promueve actitudes de adaptación a la persona de acuerdo a su discapacidad?                                                                                               | <input type="checkbox"/> | <input type="checkbox"/> | <input type="checkbox"/> | <input type="checkbox"/> |
| 17.                                                  | ¿Usted incluye a la familia inmediata de la persona dentro del proceso de rehabilitación?                                                                                        | <input type="checkbox"/> | <input type="checkbox"/> | <input type="checkbox"/> | <input type="checkbox"/> |
| 18.                                                  | ¿Usted considera que todas las acciones anteriores <b>No</b> son del campo de acción de un fisioterapeuta?                                                                       | <input type="checkbox"/> | <input type="checkbox"/> | <input type="checkbox"/> | <input type="checkbox"/> |
| <b>Acciones del fisioterapeuta en el Mesosistema</b> |                                                                                                                                                                                  |                          |                          |                          |                          |
| 19.                                                  | ¿Usted establece contacto con la familia extensa de la persona dentro del proceso de rehabilitación?                                                                             | <input type="checkbox"/> | <input type="checkbox"/> | <input type="checkbox"/> | <input type="checkbox"/> |
| 20.                                                  | ¿Usted educa a las personas sobre la prevención de la discapacidad?                                                                                                              | <input type="checkbox"/> | <input type="checkbox"/> | <input type="checkbox"/> | <input type="checkbox"/> |
| 21.                                                  | ¿Usted reconoce la ruta de atención a la persona con discapacidad para su asesoramiento efectivo?                                                                                |                          |                          |                          |                          |
| 22.                                                  | ¿Usted fomenta el reconocimiento de la persona con discapacidad como un sujeto de derechos?                                                                                      | <input type="checkbox"/> | <input type="checkbox"/> | <input type="checkbox"/> | <input type="checkbox"/> |
| 23.                                                  | ¿Usted recomienda a la persona algún tipo de asesorías jurídicas como una forma de reclamar sus derechos?                                                                        | <input type="checkbox"/> | <input type="checkbox"/> | <input type="checkbox"/> | <input type="checkbox"/> |

|     |                                                                                                                                                                      |                          |                          |                          |                          |
|-----|----------------------------------------------------------------------------------------------------------------------------------------------------------------------|--------------------------|--------------------------|--------------------------|--------------------------|
|     |                                                                                                                                                                      |                          |                          |                          |                          |
| 24. | ¿Usted conoce sobre políticas públicas en discapacidad?                                                                                                              | <input type="checkbox"/> | <input type="checkbox"/> | <input type="checkbox"/> | <input type="checkbox"/> |
| 25. | ¿Si conoce de políticas públicas usted es crítico frente a su cumplimiento y lo expresa?                                                                             | <input type="checkbox"/> | <input type="checkbox"/> | <input type="checkbox"/> | <input type="checkbox"/> |
| 26. | ¿Usted interviene en la valoración de ayudas técnicas y orienta a la persona con discapacidad sobre cómo acceder a ellas?                                            | <input type="checkbox"/> | <input type="checkbox"/> | <input type="checkbox"/> | <input type="checkbox"/> |
| 27. | ¿Usted conoce y difunde leyes que protegen a las personas con discapacidad en su lugar de trabajo?                                                                   | <input type="checkbox"/> | <input type="checkbox"/> | <input type="checkbox"/> | <input type="checkbox"/> |
| 28. | ¿Usted promueve y se preocupa por conocer el acceso a la cultura, recreación, comunicación, entre otras, de la persona con discapacidad?                             | <input type="checkbox"/> | <input type="checkbox"/> | <input type="checkbox"/> | <input type="checkbox"/> |
| 29. | ¿Usted está atento a la situación económica de la persona y su familia y si esta afecta el normal proceso de rehabilitación?                                         | <input type="checkbox"/> | <input type="checkbox"/> | <input type="checkbox"/> | <input type="checkbox"/> |
| 30. | ¿Usted está atento sobre procesos de inclusión social y/o laboral de la persona con discapacidad?                                                                    | <input type="checkbox"/> | <input type="checkbox"/> | <input type="checkbox"/> | <input type="checkbox"/> |
| 31. | ¿Usted está alerta del aislamiento social y la depresión de la persona con discapacidad?                                                                             | <input type="checkbox"/> | <input type="checkbox"/> | <input type="checkbox"/> | <input type="checkbox"/> |
| 32. | ¿Usted está atento en lo relacionado con la adecuada cobertura en salud de la persona con discapacidad?                                                              | <input type="checkbox"/> | <input type="checkbox"/> | <input type="checkbox"/> | <input type="checkbox"/> |
| 33. | ¿Usted considera que todas las acciones anteriores <b>No</b> son del campo de acción de un fisioterapeuta?                                                           | <input type="checkbox"/> | <input type="checkbox"/> | <input type="checkbox"/> | <input type="checkbox"/> |
|     | <b>Acciones del fisioterapeuta en el Exosistema</b>                                                                                                                  |                          |                          |                          |                          |
| 34. | ¿Usted contribuye a la transformación de creencias en la población sobre la incapacidad de una persona con discapacidad en realizar actividades de cualquier índole? | <input type="checkbox"/> | <input type="checkbox"/> | <input type="checkbox"/> | <input type="checkbox"/> |
| 35. | ¿Usted está atento a que la institución de salud donde labora cuente con la accesibilidad necesaria para el ingreso de la persona con discapacidad?                  | <input type="checkbox"/> | <input type="checkbox"/> | <input type="checkbox"/> | <input type="checkbox"/> |
| 36. | ¿Usted realiza actividades de la Rehabilitación Basada en Comunidad (RBC)?                                                                                           | <input type="checkbox"/> | <input type="checkbox"/> | <input type="checkbox"/> | <input type="checkbox"/> |
| 37. | ¿Usted está atento a que la persona con discapacidad se beneficie de la RBC?                                                                                         | <input type="checkbox"/> | <input type="checkbox"/> | <input type="checkbox"/> | <input type="checkbox"/> |
| 38. | ¿Usted promueve la independencia, participación y autonomía de la persona con discapacidad?                                                                          | <input type="checkbox"/> | <input type="checkbox"/> | <input type="checkbox"/> | <input type="checkbox"/> |

|     |                                                                                                                                                                                                                                                                                             |                          |                          |                          |                          |
|-----|---------------------------------------------------------------------------------------------------------------------------------------------------------------------------------------------------------------------------------------------------------------------------------------------|--------------------------|--------------------------|--------------------------|--------------------------|
| 39. | ¿Usted está atento la existencia de hechos aislados a la salud que pueden afectar negativamente a la persona con discapacidad ej: violencia física, abandono, exclusión, drogadicción, entre otros?                                                                                         | <input type="checkbox"/> | <input type="checkbox"/> | <input type="checkbox"/> | <input type="checkbox"/> |
| 40. | ¿Usted está atento a que los roles que desempeña la persona son los adecuados según las circunstancias biológicas y ambientales? ejemplo: una niña (de 17 años o menos) con discapacidad en estado de embarazo, aquí se ejerce un rol en el que su cuerpo no está preparado biológicamente. | <input type="checkbox"/> | <input type="checkbox"/> | <input type="checkbox"/> | <input type="checkbox"/> |
| 41. | ¿Usted logra identificar algunos elementos de la capacidad de adaptación de la persona con discapacidad al enfrentar nuevos roles o entornos, aprender de ellos y transformarlos?                                                                                                           | <input type="checkbox"/> | <input type="checkbox"/> | <input type="checkbox"/> | <input type="checkbox"/> |
| 42. | ¿Usted considera que todas las acciones anteriores <b>No</b> son del campo de acción de un fisioterapeuta?                                                                                                                                                                                  | <input type="checkbox"/> | <input type="checkbox"/> | <input type="checkbox"/> | <input type="checkbox"/> |

Elaborado por:  
Paula Andrea Peña Hernández  
Docente Facultad de Salud  
Universidad Santiago de Cali

#### Datos de validación y propiedades psicométricas:

Este instrumento fue validado cualitativa y cuantitativamente. Se hizo un juicio de cinco expertos y prueba piloto con 10 fisioterapeutas semejantes a la muestra para la validación cualitativa. Para la validación cuantitativa se validó la fiabilidad mediante el Alfa de Cronbach resultando en 0.946. Además de validar los dominios Microsistema, Mesosistema y Exosistema todos con alfa de Cronbach por encima de 0.8. La validación de constructo se hizo mediante un análisis factorial de extracción resultado en pruebas como la KMO en 0.76 y la prueba de Bartlett con 0.000. La extracción de los 42 ítems dio valores desde 0.589 hasta 0.844.
